11. Sun H, Culley DJ, Lien CA, Kitchener DL, Harman AE, Warner DO: Predictors of performance on the Maintenance of Certification in Anesthesiology Program® (MOCA®) examination. *J Clin Anesth* 2015; 27:1–6
12. Kearney RA, Sullivan P, Skakun E: Performance on ABA-ASA in-training examination predicts success for RCPSC certification. American Board of Anesthesiology-American Society of Anesthesiologists. Royal College of Physicians and Surgeons of Canada. *Can J Anaesth* 2000; 47:914–8
13. Zhou Y, Sun H, Culley DJ, Young A, Harman AE, Warner DO: Effectiveness of written and oral specialty certification examinations to predict actions against the medical licenses of anesthesiologists. *ANESTHESIOLOGY* 2017; 126:1171–9
14. Whelan GP, Gary NE, Kostis J, Boulet JR, Hallock JA: The changing pool of international medical graduates seeking certification training in US graduate medical education programs. *JAMA* 2002; 288:1079–84

## ANESTHESIOLOGY REFLECTIONS FROM THE WOOD LIBRARY-MUSEUM

### Dr. C. H. Cannon's Armamentarium: "Local Anaesthetics...Gas or Either"

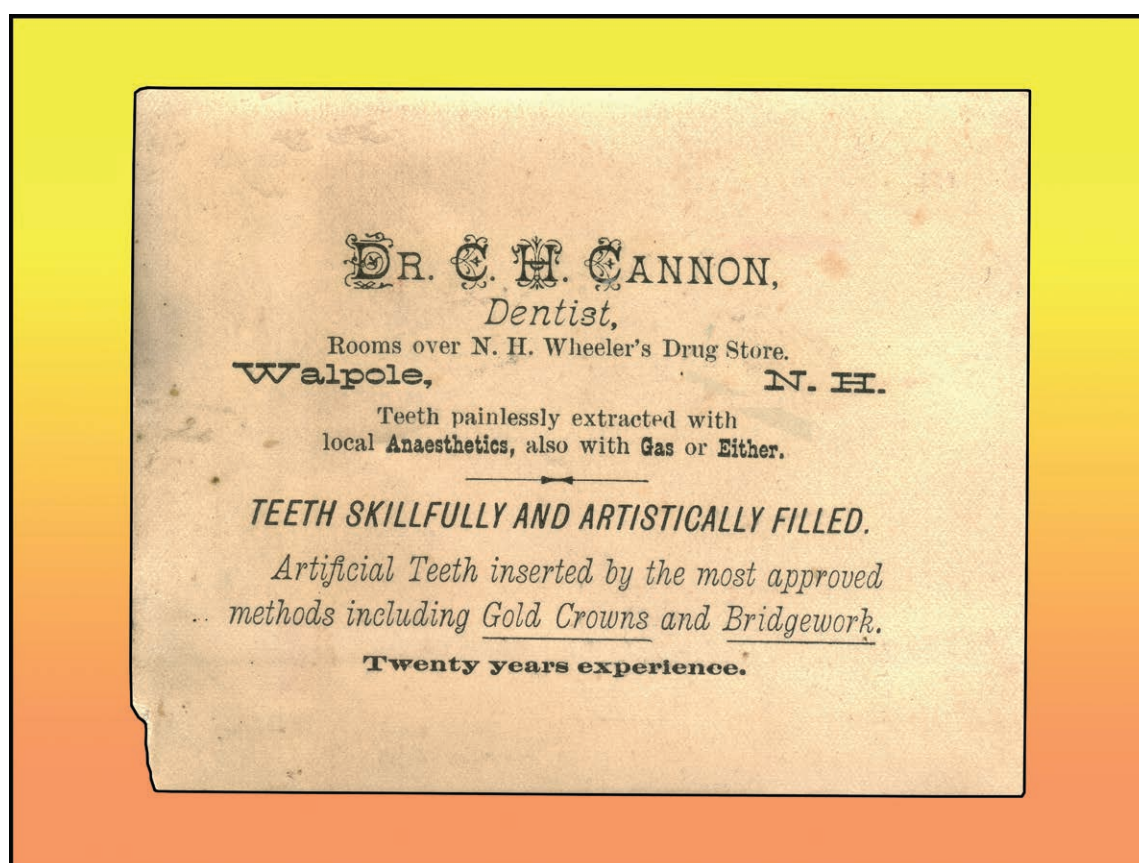

From the Wood Library-Museum's Ben Z. Swanson Collection, dentist Charles H. Cannon (c. 1847–1909) had problems managing the printer of his trade card (above). First, his printer misspelled Cannon's anesthetic armamentarium as "local **Anaesthetics**, also with **Gas** or **Either**." Then the advertising was printed downhill on the card. Because dentist Cannon was listed in the 1896 but not the 1897 directory for Providence, Rhode Island, we can surmise that he did not arrive in Walpole, New Hampshire, until late in 1896 or in 1897. Because the druggist referred to on this card, N. H. Wheeler, ended up moving to Vermont in 1898, we can date this trade card to approximately 1897. That means that hapless Dr. Cannon may have had less than one year's use of his typographically challenged trade cards. (Copyright © the American Society of Anesthesiologists' Wood Library-Museum of Anesthesiology.)

George S. Bause, M.D., M.P.H., Honorary Curator and Laureate of the History of Anesthesia, Wood Library-Museum of Anesthesiology, Schaumburg, Illinois, and Clinical Associate Professor, Case Western Reserve University, Cleveland, Ohio. UJYC@aol.com.
